# Supplementary material
Source: Springer Nature journal article supplement (https://www.springermedizin.de/resource/supplementary/12889_2012_4445_MOESM2_ESM.pdf/9492814)

## State Change T0-T1, Subjective Health

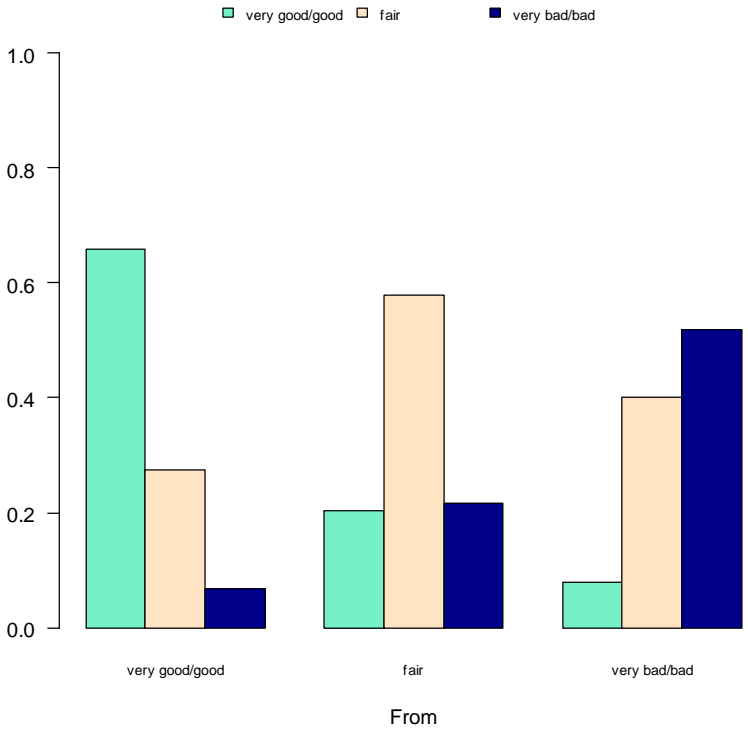

2B

## State Change T0-T2, Subjective Health

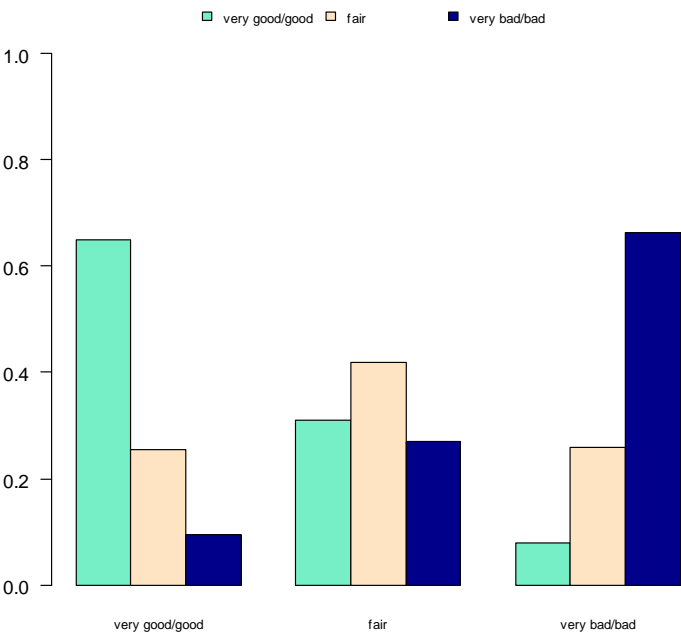

Supplement: MOESM2 [file 9492814]
